# Supplementary material for: Detection and Molecular Characterization of Adenoviruses in Captive and Free-Roaming African Green Monkeys (Chlorocebus sabaeus): Evidence for Possible Recombination and Cross-Species Transmission
Source: MDPI journal article supplement (doi:10.3390/v15071605), 2023-07-22
Supplement: s1 [file s1]

**Table S1.** Primers used to obtain the complete/nearly complete DNA-dependent DNA polymerase and hexon coding sequences, and partial penton base coding sequences of simian adenovirus (SAdV) strains KNA-S6 and KNA-08975 detected in African green monkeys from St. Kitts. Primers employed in semi-nested PCR assays to amplify a region of the putative hexon that is genetically divergent between SAdV-17, -18 and *Human mastadenovirus-F* strains (HAdV-F) are highlighted with yellow. Forward primers (used in combination with 2 reverse primers designed from partial penton base sequences of KNA-S6 and KNA-08975) that failed to amplify the 5'- region of the penton base are shown with red font.

| Target gene                  | Primer name                 | Primer sequence <sup>1</sup> (5'-3')  | Primer position <sup>2</sup> |
|------------------------------|-----------------------------|---------------------------------------|------------------------------|
| DNA-dependent DNA polymerase | NHP-pol-5ENDF               | TCTACGGCATCTCGATCCAGCAG               | nt 5228-nt 5250              |
|                              | NHP-pol-5ENDR               | AAGCTCTACGCCCTCAAGTGCCTC              | nt 5591-nt 5569              |
|                              | NHP-pol-5261F               | TGCGGGGGTTGGGRCGGCTTT                 | nt 5261-nt 5281              |
|                              | NHP-pol-5283F               | GCTGTASGGBACCAGBCGGTG                 | nt 5283-nt 5303              |
|                              | NHP-pol-5946R               | GGTGGATCCCCCTGGTGGAGAACG              | nt 5946-nt 5924              |
|                              | NHP-pol-5800F               | GATTTGAGCGCGCGCTGCTCCAG               | nt 5800-nt 5822              |
|                              | NHP-pol-6954R               | CTCCAACTCSCACGCCATCTT                 | nt 6954-nt 6934              |
|                              | NHP-pol-6976R               | TCTTYCAGCGSCCCACCATCTC                | nt 6976-nt 6955              |
|                              | NHP-pol-6721F               | CCCCAGGGCATGGRTGGGT                   | nt 6721-nt 6740              |
|                              | NHP-pol-6742F               | AGGGCCGAGGCGTACATGCC                  | nt 6742-nt 6761              |
|                              | NHP-pol-7983R               | CACCTACGACGTGARGACCTACAC              | nt 7983-nt 7960              |
|                              | NHP-pol-7751F               | TCTGGAGGCGGTGCGGTAGT                  | nt 7751-nt 7771              |
|                              | NHP-pol-7774F               | CGGAACTTTTTGCCACCGCCA                 | nt 7774-nt 7795              |
|                              | NHP-pol-8817R               | CTGTGAACTCTCTTTCAGGTTC                | nt 8817-nt 8795              |
|                              | NHP-pol-8752R               | CAGGACCTCAACCGCCGCGT                  | nt 8752-nt 8733              |
| Hexon                        | NHP-hex-18098F              | AACAGCATYGTGGGYCTGGG                  | nt 18098-nt 18117            |
|                              | NHP-hex-18582R              | CGGTCCAGCACGCCGCGGATGTC               | nt 18582-nt 18560            |
|                              | NHP-hex-18625R              | GGAGTTGTAAGCGGTGCCGGAGTA              | nt 18625-nt 18602            |
|                              | NHP-hex-18253F              | CAAGATGGCCACCCCCTCSATGATGC            | nt 18253-nt 18278            |
|                              | NHP-hex-18308F              | CAGGACGCCTCGAGTACCTGAGC               | nt 18308-nt 18331            |
|                              | NHP-hex-18837R <sup>3</sup> | TCTCCGGCTTCGCTGTCCACTG <sup>3</sup>   | nt 18837-nt 18815            |
|                              | NHP-hex-18836R <sup>4</sup> | GCGTGGGATCAATATTCCATTGCG <sup>4</sup> | nt 18836-nt 18813            |
|                              | NHP-hex-18494F              | TACAAAGTGCCTTCACGCTGG                 | nt 18494-nt 18515            |
|                              | NHP-hex-18524F              | GACAACCGCGTGCTGGACATG                 | nt 18524-nt 18544            |
|                              | NHP-hex-19337R              | GGTCATAGCTGTCYACGGCCTG                | nt 19337-nt 19316            |
|                              | NHP-hex-19100F <sup>3</sup> | CAGCAGCGCGCTCCCAACAGAC <sup>3</sup>   | nt 19100-nt 19117            |
|                              | NHP-hex-19177F <sup>3</sup> | TGGAATATGGGAGTTCTTGCGGG <sup>3</sup>  | nt 19177-nt 19200            |
|                              | NHP-hex-19174F <sup>4</sup> | CACCTGGTAATATGGGGTCTTGCG <sup>4</sup> | nt 19174-nt 19197            |
|                              | NHP-hex-19192F <sup>4</sup> | CTTGGCAGGTCAGGCTTCGCAAC <sup>4</sup>  | nt 19192-nt 19213            |
|                              | NHP-hex-20006R              | AGTTGGCGTAVAGGTTRATGCTGTC             | nt 20006-nt 19982            |
|                              | NHP-hex-19883F              | TCCTACACCTACGAGTGAACCTT               | nt 19883-nt 19905            |
|                              | NHP-hex-20887R              | CTCATCCATGGGGTCCACCTC                 | nt 20887-nt 20867            |
|                              | NHP-hex-20946R              | TGCGGCTGGTGGATGCGCAC                  | nt 20946-nt 20927            |
|                              | NHP-hex-20783F              | AACCTCATGTCCATGGGGGC                  | nt 20783-nt 20802            |
|                              | NHP-hex-21114R              | AAGCGYTTGTCRAASGTGCCCA                | nt 21114-nt 21093            |
|                              | NHP-hex-21162R              | GTGTTACRATGGCGCASGCCA                 | nt 21162-nt 21141            |
| Penton base                  | NHP-pen-13461               | TGGARAGCCTRGTRGAYAAGATGAA             | nt 13461- nt 13485           |
|                              | NHP-pen-13496               | ACSTACGCSCAGGAGCAGCGGG                | nt 13496- nt 13517           |
|                              | NHP-pen-13610               | AGCGTGTGGACTTGGGGGG                   | nt 13610-nt 13629            |
|                              | NHP-pen-13658               | GCYCACTGCGSCCKCAGGG                   | nt 13658-nt 13677            |
|                              | NHP-pen-14407F              | GAAGTTYGACACGCGCAACTCCG               | nt 14407-nt 14430            |
|                              | NHP-pen-14462F              | ATGCCSGCGGTGTACACCAACGAG              | nt 14462-nt 14485            |
|                              | NHP-pen-15243R              | GCGTCRGTGATGGTCACGCGC                 | nt 15243-nt 15223            |
|                              | NHP-pen-15210R              | ATRCTGCTGCGCAGCGGCAGGG                | nt 15210-nt 15189            |
|                              | NHP-pen-15036F              | ACGAGCAGGCCGTCTACTCGCAGC              | nt 15036-nt 15059            |
|                              | NHP-pen-15446R              | CGGTAGTGGCCGCGGACGCG                  | nt 15446-nt 15427            |

|                |                      |                   |
|----------------|----------------------|-------------------|
| NHP-pen-15404R | CGCTTGGCGCCGCGGTACAT | nt 15404-nt 15385 |
|----------------|----------------------|-------------------|

<sup>1</sup> The primers were designed following multiple alignment of the complete genomic sequences of SAdV-18 strain C676 (GenBank accession number FJ025931), SAdV-17 strain B-105 (KP329566), and HAdV-F strains (HAdV-40 isolates Dugan (L19443) and SA12680 (MK883611), and HAdV-41 isolate Tak (DQ315364)).

<sup>2</sup> Nucleotide positions are those of SAdV-18 (FJ025931).

<sup>3,4</sup> Primers specific to SAdV strain KNA-08975 <sup>3</sup> and KNA-S6 <sup>4</sup> (designed from partial hexon sequences of respective virus strains), respectively.

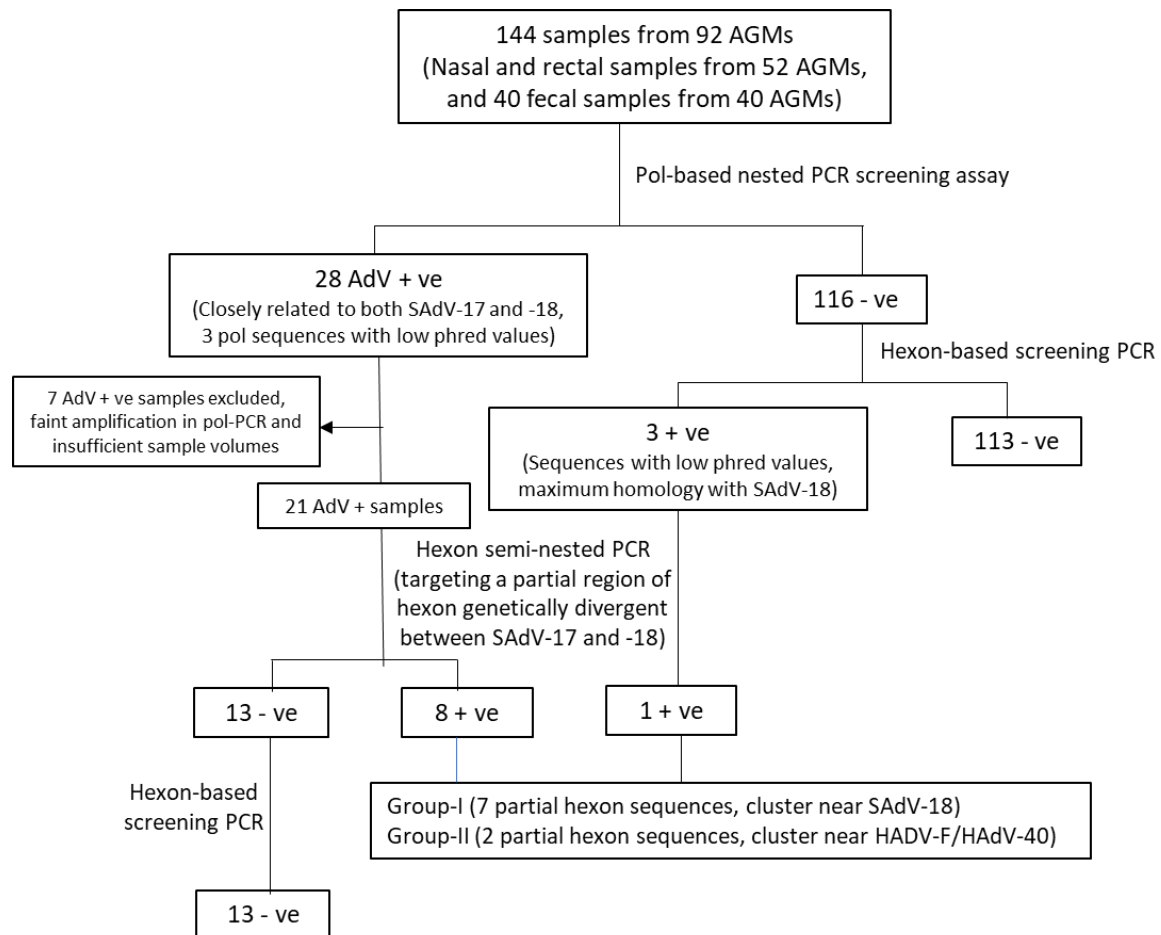

**Figure S1.** Flow chart summarizing the work pipeline and PCR results from the present study.



|                       |                                                                                           |
|-----------------------|-------------------------------------------------------------------------------------------|
| KNA-S6<br>54          | -----PGAGGLHAAEAHPGTQPPRRRARQSAASPAPAAAGAPRRRAVAAAAGGTRTPAA                               |
| KNA-08975<br>54       | -----PGAGGLHAAEAHPGTQPPRRRARQSAASPAPAAAGAPRRRAVAAAAGGTRTPAA                               |
| SAdV-F/SAdV-18<br>60  | MALVPSPGTGGLHAAEAHPGPQPPRRRARQSAASSAPAAAGAPRRRAAAAHAGGTRTPAA                              |
| SAdV-F/SAdV-17<br>60  | MALVPSPGTGGLHAEKAHPGPQPPRRRARQSAASPAPAAAGAPRRRAAGAHAGGSRTTPAA                             |
| HAdV-F/HAdV-40<br>60  | MALVPSPRAGGFLPAETHSGPQPPRRRVQSTAGAAAPTATRAPRRRAATASPGEPPSTTA                              |
| HAdV-F/HAdV-41<br>60  | MALVPSPGTGLGLHSTKTYPGTQPPRCRARQSAAGSASTATRAPGQRASTSSSGGSRTATA                             |
|                       | * : * : . : : . * . * * * * * . * * * : * . * . : : *                                     |
| KNA-S6<br>109         | ARRPTAANHVS-----PAYRRHRGTIVAGRGHALLYAVDTSTNEPLEFKYHQRLAPALTR                              |
| KNA-08975<br>109      | ARRPTAANHVS-----PAYRRHRGTIVAGRGHALLYAVDTSTNEPLEFKYHQRLAPALTR                              |
| SAdV-F/SAdV-18<br>120 | ARRQAQAGDVTSPPEYATYRRHRGTIVAARGQALLYAIDTSTNEPLEIKYHQRLAPALTR                              |
| SAdV-F/SAdV-17<br>118 | ARRQAAADV--PPEHATYRRHRGTIVAARGHGLLYAIDTSTNEPLEIKYHQRLAPALTR                               |
| HAdV-F/HAdV-40<br>116 | SGRPPAANNVS----LTPNSRLRGTIVAPRGQGLLYAIDTATNSPMEIKFHRRLASALTR                              |
| HAdV-F/HAdV-41<br>116 | PRRPSASNDVN----PPSTFRLRGTIVASRGQGLLYAIDTSTNSPLEIKFHQRLASALTR                              |
|                       | . * . : . . . * * * * * * * * : . * * * : * * : * : * : * : * * . * * *                   |
| KNA-S6<br>169         | LLQVHRRTLTPVDLNEAFLNSLDAAQIRALALRLRPPRVDIWTGSRGVVTPSVLHPQQER                              |
| KNA-08975<br>169      | LLQVHRRTLTPVDLNEAFLNSLDAAQIRALALRLRPPRVDIWTGSRGVVTPSVLHPQQER                              |
| SAdV-F/SAdV-18<br>180 | LLQVHRRTLTPVDLSEAFDLSLDAAQIRTLALSLRPPRVDIWTGSRGVVTPSVLHPQQER                              |
| SAdV-F/SAdV-17<br>178 | LLQVHRRTLTPVDLDEAFDLSLDAAHIRTLALRLRPPRVDIWTGSLRGIVTPSVLHPQQER                             |
| HAdV-F/HAdV-40<br>176 | LLQVNLRSVPADLNEAFLDLSLSSQIRTLALKLKVPRVEVWTCGSRGVVPSIIHPQQER                               |
| HAdV-F/HAdV-41<br>176 | LLQVNLRLSLPAGLSEAFDLSLSSQIRSLALRLQPPRVEVWTCASRGIVTPSVILPQQER                              |
|                       | * * * * : * : * . * . * * * * : * * * : * * : * * * * * : * * : * * * : * * * * : * * * * |
| KNA-S6<br>229         | AGAEEHDEAEGQRAEAPLDCPLRFLVGRGRRVHLVQEVQSVQRCEHCARFYKYQHECTVRR                             |
| KNA-08975<br>229      | AGAEEHDEAEGQRAEAPLDCPLRFLVGRGRRVHLVQEVQSVQRCEHCARFYKYQHECTVRR                             |
| SAdV-F/SAdV-18<br>240 | AGAEEHDEAEGQRAEAPLDCPLRLLVGRGRRVHLVQEVQSVQRCEYCARFYKYQHECTVRR                             |
| SAdV-F/SAdV-17<br>238 | AGAEEHDEAEGQHAELPLNCPRLLLVGRGRRVHLVQEVQSVQRCEYCARFYKHQHECTVRR                             |
| HAdV-F/HAdV-40<br>236 | AGAEEGDEGERQDTEDFLNFLPLRFLVGRQVHLIQEMQSVQRCEYCARFYKYQHECTVRR                              |
| HAdV-F/HAdV-41<br>236 | AGAEENNEGERQSAQEPLNFLPLRFLVGRQVHLIQEVQNVQRCEYCARFYKYQHECTVRR                              |
|                       | * * * * * : * . * * : : * : * * * : * * * : * * : * . * * * * : * * * * : * * * * *       |
| KNA-S6<br>289         | RDFYFHHVNAHSSGWWQEINFFPLGSHPRTERLFVITYDVETYTWMGAFGKQLVPFMLVMH                             |
| KNA-08975<br>289      | RDFYFHHVNAHSSGWWQEINFFPLGSHPRTERLFVITYDVETYTWMGAFGKQLVPFMLVMH                             |
| SAdV-F/SAdV-18<br>300 | RDFYFHHVNAHSSGWWQEINFFPLGSHPRTERLFVITYDVETYTWMGAFGKQLVPFMLVMH                             |
| SAdV-F/SAdV-17<br>298 | RDFYFHHVNAHSSGWWQQINFFPLGSHPRTERLFVITYDVETYTWMGAFGKQLVPFMLVMH                             |
| HAdV-F/HAdV-40<br>296 | RDFYFHHINAHSSGWWQKINFFPIGSHPRVERLFVITYDVETYTWMGAFGKQLVPFMLVMH                             |
| HAdV-F/HAdV-41<br>296 | RNFYFHHINAQSSGWWQEINFFPIGSHPRVERLFVITYDVETYTWMGAFGKQLVPFMLVMH                             |
|                       | * : * * * * : * : * * * * : * * * * : * * * . * * * * * * * * * * * * * * * *             |

|                       |                                                               |
|-----------------------|---------------------------------------------------------------|
| KNA-S6<br>349         | LSGEEALVEEACRLAREQSWDAWGEGDGRTFYVVVTPEKMAVGKKFRDYRDLQTALALQLW |
| KNA-08975<br>349      | LSGEEALVEEACRLAREQSWDAWGEGDGRTFYVVVTPEKMAVGKKFRDYRDLQTALALQLW |
| SAdV-F/SAdV-18<br>360 | LSGEEALVEEACRLAREQNWDAGQDGRTFYVVVTPEKMAVGKKFRDYRDLQTQLALQLW   |
| SAdV-F/SAdV-17<br>358 | LSGEETLVEEACRLAREQSWDAWGEGDGRTFYVVVTPEKMAVGKKFRDYRDLQTALALQLW |
| HAdV-F/HAdV-40<br>356 | LSGEEALVKEACRLACELQWDWTGNDERTFYVVVTPEKLAVGKKFREYRNRLQAHFALQLW |
| HAdV-F/HAdV-41<br>356 | LSGDDTLVEEACRLAHELQWDAGNDGHTFYVVVTPEKMAVGKKFRNYRDLQTHFATQLW   |
|                       | ***:::**:***** * .**:**:* :*****:*****:**:***: :* **          |
| KNA-S6<br>409         | RGFLQANPQVADWARQELGLYSPDCLTYEELKKAPKLQGRPRFVELYIVGHNINGFDEIV  |
| KNA-08975<br>409      | RGFLQANPQVADWARQELGLYSPDCLTYEELKKAPKLQGRPRFVELYIVGHNINGFDEIV  |
| SAdV-F/SAdV-18<br>420 | RGFLQANPQVAEWARQELGLYSPDCLTYEELKKAPKLQGRPRFVELYIVGHNINGFDEIV  |
| SAdV-F/SAdV-17<br>418 | RGFLQANPQVAEWARQELGLYSPDCLTYEELKKAPKLQGRPRFVELYIVGHNINGFDEIV  |
| HAdV-F/HAdV-40<br>416 | RGFLAANPQLAEWACLEMGLFSPDYLTYEELQKAPKLQGRPRFLELYIVGHNINGFDEIV  |
| HAdV-F/HAdV-41<br>416 | QAFLAANPQVAEWARLEMGLFSPDNLTYEELKKAPKLQGTPRFVELYIVGHNINGFDEIV  |
|                       | :. ** *****:**:** *:**:** *****:***** ***:*****               |
| KNA-S6<br>469         | LAAQVINNRSDVPGPFRI TRNFMPRAGKILFNDVTFALPNPRSQKRTDYGLWERGACDDT |
| KNA-08975<br>469      | LAAQVINNRSDVPGPFRI TRNFMPRAGKILFNDVTFALPNPRSQKRTDYGLWERGACDDT |
| SAdV-F/SAdV-18<br>480 | LAAQVINNRSDVPGPFRI TRNFMPRAGKILFNDVTFALPNPRSQKRTDYGLWERGACDDT |
| SAdV-F/SAdV-17<br>478 | LAAQVINNRSDVPGPFRI TRNFMPRAGKILFNDVTFALPNPRSQKRTDYGLWERGACDDT |
| HAdV-F/HAdV-40<br>476 | LAAQVINNRSDVPGPFKITRNFMPRAGKILFNDITFALPNPSSKKRTDYRLWEQGACDDS  |
| HAdV-F/HAdV-41<br>476 | LAAQVINNRSDVPGPFKITRNFMPRAGKILFNDITFALPNPLSKKRTDYHLWEQGACDDT  |
|                       | *****:*****:***** *:***** ***:*****:                          |
| KNA-S6<br>529         | DFRFQFLKVMVRDTFALHTHTSLRKAQAAYALPVEKGCCPYRAVNRFYMLGSYLADERGFP |
| KNA-08975<br>529      | DFRFQFLKVMVRDTFALHTHTSLRKAQAAYALPVEKGCCPYRAVNRFYMLGSYLADERGFP |
| SAdV-F/SAdV-18<br>540 | DFRFQFLKVMVRDTFALHTHTSLRKAQAAYSLPVEKGCCPYRAVNRFYMLGSYLADERGFP |
| SAdV-F/SAdV-17<br>538 | DFRFQFLKVMVRDTFALHTHTSLRKAQAAYSLPVEKGCCPYRAVNRFYMLGSYLADERGFP |
| HAdV-F/HAdV-40<br>536 | DFKYQFLKVMVRDTFALHTHTSLRKAQAAYTLPVEKGCCPYKAVNEFYMLGSYRADERGFP |
| HAdV-F/HAdV-41<br>536 | DFKHQFLKVMVRDTFALHTHTSLRKAQAAYALPVEKGCCPYKAVNQFYMLGSYRADERGFP |
|                       | **:. *****:*****:***.***** *****                              |
| KNA-S6<br>589         | AEFYWKDREEYLLNRELWEKKQEPYDLVRETLDYCALDVLVTAALVQKLRESYAQFIHD   |
| KNA-08975<br>589      | AEFYWKDREEYLLNRELWEKKQEPYDLVRETLDYCALDVLVTAALVQKLRESYAQFIHD   |
| SAdV-F/SAdV-18<br>600 | AEFYWKDREEYLLNRELWEKKQEPYDLVRETLDYCALDVLVTAALVQKL RDSYAQFVHD  |
| SAdV-F/SAdV-17<br>598 | AEFYWKDREEYLLNRELWEKKQEPYDLVRETLDYCALDVLVTAALVQKL RDSYAQFVHD  |
| HAdV-F/HAdV-40<br>596 | AEDYWKDREEYLLNRELWEKKQCPHYDLVRETLDYCALDVLVTAALVQKLRESYAQFIRD  |
| HAdV-F/HAdV-41<br>596 | AEDYWKDREEYLLNRELWEKKQQSRDYDLIRETLDYCALDVLVTAALVQKLRESYAQFICD |
|                       | ***.***** .***.*****.*****.*****.                             |

|                       |                                                               |
|-----------------------|---------------------------------------------------------------|
| KNA-S6<br>649         | AVGLPEASFNIFQRPTISSNSHAIFRQVTYRAVRPQRADLGGGLLAPSHEMYDYVRASIR  |
| KNA-08975<br>649      | AVGLPEASFNIFQRPTISSNSHAIFRQVTYRAVRPQRADLGGGLLAPSHEMYDYVRASIR  |
| SAdV-F/SAdV-18<br>660 | AVGLPEASFNIFQRPTISSNSHAIFRQVTYRAVRPQRGDLGGGLLAPSHEMYDYVRASIR  |
| SAdV-F/SAdV-17<br>658 | AVGLPEASFNIFQRPTISSNSHAIFRQVTYRAVKPQRGDLGGGLLAPSHEMYDYVRASIR  |
| HAdV-F/HAdV-40<br>656 | AVGLPEASFNVFQRPTISSNSHAIFRQILYRTVKPQRSDLGGGLLAPSHEMYDYVRASIR  |
| HAdV-F/HAdV-41<br>656 | AVGLPEAKFNVFQRPTISSNSHAIFRQILYRSVKPKRSDLGNLLAPSHEMYDYVRASIR   |
|                       | *****. **:*****: **:*:*.***.*****                             |
| KNA-S6<br>709         | GGRCYPTYLGVLREPLYVYDICGMYASALTHMPWGAPLNPYERALAVRDWERALADPAV   |
| KNA-08975<br>709      | GGRCYPTYLGVLREPLYVYDICGMYASALTHMPWGAPLNPYERALAVRDWERALADPAV   |
| SAdV-F/SAdV-18<br>720 | GGRCYPTYLGVLREPLYVYDICGMYASALTHMPWGAPLNPYERALAVRDWERALADPAV   |
| SAdV-F/SAdV-17<br>718 | GGRCYPTYLGVLREPLYVYDICGMYASALTHMPWGAPLNPYERALAVRDWERALADPAV   |
| HAdV-F/HAdV-40<br>716 | GGRCYPTYIGVLREPLYVYDICGMYASALTHMPWGFPLNPYERALAVRDWEHALLQVGT   |
| HAdV-F/HAdV-41<br>716 | GGRCYPTYIGVLREPLYVYDICGMYASALTHMPWGSPLNPYERALAVRDWERRALLQVDT  |
|                       | *****:***** *****:*** :                                       |
| KNA-S6<br>769         | SIDYFDRQLLPGIFTIDADPPAEDQLDVLPPFCSRKGGRCLCWTNEPLRGEVATSVDLITL |
| KNA-08975<br>769      | SIDYFDRQLLPGIFTIDADPPAEDQLDVLPPFCSRKGGRCLCWTNEPLRGEVATSVDLITL |
| SAdV-F/SAdV-18<br>780 | AIDYFDRHLLPGIFTIDADPPAEDQLDVLPPFCSRKGGRCLCWTNEPLRGEVATSVDLITL |
| SAdV-F/SAdV-17<br>778 | AIDYFDRHLLPGIFTIDADPPAEDQLDVLPPFCSRKGGRCLCWTNEPLRGEVATSVDLITL |
| HAdV-F/HAdV-40<br>776 | PIDYFNRTLPGIFTIDADPPENLLDVLPPPLCSRKGGRCLCWTNEPLRGEVVTSDVLITL  |
| HAdV-F/HAdV-41<br>776 | PIDYFNHVLLPGIFTIDADPPSENLLDVLPPYCSRKGGRCLCWTNEPLRGEVATSIDLITL |
|                       | .****: : *****. *: ***** ***** *****. **:*****                |
| KNA-S6<br>829         | HNRGWRVRLLPDERATVFPEWRCVAREYVQLNIAAKERADREKNQTLRSIAKLLSNALYG  |
| KNA-08975<br>829      | HNRGWRVRLLPDERATVFPEWRCVAREYVQLNIAAKERADREKNQTLRSIAKLLSNALYG  |
| SAdV-F/SAdV-18<br>840 | HNRGWRVRLLPDERATVFPEWRCVAREYVQLNIAAKERADREKNQTLRSIAKLLSNALYG  |
| SAdV-F/SAdV-17<br>838 | HNRGWRVRLLPDERATVFPEWRCVAREYVQLNIAAKERADREKNQTLRSIAKLLSNALYG  |
| HAdV-F/HAdV-40<br>836 | HNRGWHVRLLPDERATVFPEWRCVAKEYVHLNITAKERADREKNQTLRSIAKLLSNALYG  |
| HAdV-F/HAdV-41<br>836 | HNRGWQVRLLPDERTTVFPEWRCVARKYVQLNIAAKERADREKNQTLRSIAKLLSNALYG  |
|                       | *****.*****.*****: **:***:*****                               |
| KNA-S6<br>889         | SFATKLDNKKIVFSDQMDPATVKSIAAGQVNIKSTSFVETDTLSAEVMPAFQRAYSPPEQL |
| KNA-08975<br>889      | SFATKLDNKKIVFSDQMDPATVKSIAAGQVNIKSTSFVETDTLSAEVMPAFQRAYSPPEQL |
| SAdV-F/SAdV-18<br>900 | SFATKLDNKKIVFSDQMDPATVKSIAAGQVNIKSTSFVETDTLSAEVMPAFQRAYSPPEQL |

|                        |                                                              |
|------------------------|--------------------------------------------------------------|
| SADV-F/SAdV-17<br>898  | SFATKLDNKKIVFSDQMDPATVKSIAAGQVNIKSTSFVETDTLSAEVMPAFQRAYSPEQL |
| HAdV-F/HAdV-40<br>896  | SFATKLDNKKIVFSDQMDSATIKSIAAGQINIKSTSFVETDTLSAEVMPTFQRAYSPEQL |
| HAdV-F/HAdV-41<br>896  | SFATKLDNKKIVFSDQMDPATIKSIAAGQIKIKSTSFVETDTLSAEVMPAFQRAYSPEQL |
|                        | *****.**:*****.:*****:*****.                                 |
| KNA-S6<br>949          | DLVHSDAEESDGETGHAPFYKPTRDPDGHVTTYTYKPITFMDAEEDDLCLHLEKVDPLVE |
| KNA-08975<br>949       | DLVHSDAEESDGETGHAPFYKPTRDPDGHVTTYTYKPITFMDAEEDDLCLHLEKVDPLVE |
| SAdV-F/SAdV-18<br>960  | DLVHSDAEESDGEAGHAPFYKPTRDPDGHVTTYTYKPITFMDAEEDDLCLHLEKVDPLVE |
| SADV-F/SAdV-17<br>958  | DLVHSDAEESDGEAGHAPFYKPTRDPDGHVTTYTYKPITFMDAEEDDLCLHLEKVDPLVE |
| HAdV-F/HAdV-40<br>956  | AVVHSDAEESDEEPGHAPFYTPTHKPNDHVTTYTYKPITFMDAEEDDLCLHLEKVDPLVE |
| HAdV-F/HAdV-41<br>955  | ALAHSDAEESDEERGA-LYTPTQDPKGHVTTYTYKPITFMDAEEDDLCLHLEKVDPLVE  |
|                        | :.***** * *** :*.**:.*..*****                                |
| KNA-S6<br>1009         | NDRYPSQIASFVLAWTRAFVSEWSEFLHAEDRGIPLEQRALKSVYGDTSLSFVTEAGRRL |
| KNA-08975<br>1009      | NDRYPSQIASFVLAWTRAFVSEWSEFLHAEDRGIPLEQRALKSVYGDTSLSFVTEAGRRL |
| SAdV-F/SAdV-18<br>1020 | NDRYPSQIASFVLAWTRAFVSEWSEFLHAEDRGIPLEQRALKSVYGDTSLSFVTEAGRRL |
| SADV-F/SAdV-17<br>1018 | NDRYPSQIASFVLAWTRAFVSEWSEFLHAEDRGIPLEQRALKSVYGDTSLSFVTEAGRRL |
| HAdV-F/HAdV-40<br>1016 | NNRYPSQIASFVLAWTRAFVSEWSEILYAEDRGTPLEQRTLKSVYGDTSLSFVTEAGYRL |
| HAdV-F/HAdV-41<br>1015 | NDRYPSQIASFVLAWTRAFVSEWSEFLYAEDRGTPLEQRTLKSVYGDTSLSFVTEAGHRL |
|                        | *:*****:*.*****:***** **                                     |
| KNA-S6<br>1069         | METRGGKRIKKHGGQLVFDPQRPELTWLVECETTCAQCGADAFSPESVFLAPKLYALKCL |
| KNA-08975<br>1069      | METRGGKRIKKHGGQLVFDPQRPELTWLVECETTCAQCGADTFSPETVFLAPKLYALKCL |
| SAdV-F/SAdV-18<br>1080 | METRGGKRIKKHGGQLVFDPQHPELTWLVECETTCAQCGADAYSPESVFLAPKLYALKCL |
| SADV-F/SAdV-17<br>1078 | METRGGKRIKKHGGQLVFDPQRPELTWLVECETTCAQCGADAYSPESVFLAPKLYALKCL |
| HAdV-F/HAdV-40<br>1076 | METRGGKRIKKHGGNLVFDPKHPELAWLVECETVCAQCGADAYSPESVFLAPKLYALKCL |
| HAdV-F/HAdV-41<br>1075 | METRGGKRIKKHGGSLVFDKPNPELTWLVECETTCAQCGANAYSPESVFLAPKLYALKCL |
|                        | *****.*****:.***:*****.*****:..***:*****                     |
| KNA-S6<br>1129         | QCPACGHVSKGKLRAKGHAAEALSYDLMLRCYLADSQGEDARFHTSRMSLKRTLASAQPG |
| KNA-08975<br>1129      | QCPACGHVSKGKLRAKGHAAEALSYDLMLRCYLADSQGEDARFHTSRMSLKRTLASAQPG |
| SAdV-F/SAdV-18<br>1140 | HCPACGHVSKGKLRAKGHAAEALSYDLMLKCYLADSQGEDARFHTSRMSLKRTLASAQPG |
| SADV-F/SAdV-17<br>1138 | QCPACGHVSKGKLRAKGHAAEALSYDLMLKCYLADSQGEDARFHTSRMSLKRTLASAQPG |
| HAdV-F/HAdV-40<br>1136 | RCPSCQQISKGKLRAKGHAAETLNYDLMLKCYLADFQGEDARFHTSRMSLKRTLASAQPG |
| HAdV-F/HAdV-41<br>1135 | YCPSCQHISKGKLRAKGHAAEALSYELMLKCYLADSQGEDARFHTSRMSLKRTLASAQPG |
|                        | **:* :*****:*.***:***** *****                                |
| KNA-S6                 | AHPFTVTETTLTRTLRPWRDVT LAPLDAHRLVPYSQSRPNPRNQEVCI--- 1178    |
| KNA-08975              | AHPFTVTETTLTRTLRPWRDVT LAPLDAHRLVPYSQSRPNPRNQEVCI--- 1178    |
| SAdV-F/SAdV-18         | AHPFTVTETTLTRTLRPWKDVT LASLDAHRLVPYSQSRPNPRNQEVCIEMP 1192    |
| SADV-F/SAdV-17         | AHPFTVTETTLTRTLRPWRDVT LAPLDAHRLVPYSQSRPNPRNQEVCIEMP 1190    |
| HAdV-F/HAdV-40         | ARPFTVTETNLTRTLRPWKDIT LAPLDAHRLVPYSQSRPNPRNQEVCIEMP 1188    |
| HAdV-F/HAdV-41         | AHPFTVTETTLTRTLRPWKDIT LAPLDAHRLVPYSQSRPNPRNQEVCIEMP 1187    |

\*:\*\*\*\*\*.\*\*\*\*\*:\*:\*\*\*.\*\*\*\*\*

**Figure S3.** Multiple alignment of the nearly complete deduced amino acid (aa) sequences of the putative DNA-dependent DNA polymerase (Pol) of simian adenovirus (SAdV) strains KNA-S6 and KNA-08975 with cognate sequences of SAdV-F/SAdV-17 strain B-105 (GenBank accession number KP329566), SAdV-F/SAdV-18 strain C676 (FJ025931), Human AdV-F (HAdV-F)/HAdV-40 isolate Dugan (L19443), and HAdV-F/HAdV-41 isolate Tak (DQ315364). Numbers to the right indicate the positions of the aa for respective AdV strains.

|                                           |                                                               |        |
|-------------------------------------------|---------------------------------------------------------------|--------|
| KNA-S6                                    | MATPSMMPQWSYMHIAQDASEYLSPLGVQFARATDTYFSLGNKFRNPTVAPTHDVTDDR   |        |
| 60                                        |                                                               |        |
| HAdV-F/HAdV-40                            | MATPSMMPQWSYMHIAQDASEYLSPLGVQFARATDTYFSLGNKFRNPTVAPTHDVTDDR   |        |
| 60                                        |                                                               |        |
| SAdV-F/SAdV-17                            | MATPSMMPQWSYMHIAQDASEYLSPLGVQFARATDTYFSLGNKFRNPTVAPTHDVTDDR   |        |
| 60                                        |                                                               |        |
| KNA-08975                                 | MATPSMMPQWSYMHIAQDASEYLSPLGVQFARATDTYFSLGNKFRNPTVAPTHDVTDDR   |        |
| 60                                        |                                                               |        |
| SAdV-F/SAdV-18                            | MATPSMMPQWSYMHIAQDASEYLSPLGVQFARATDTYFSLGNKFRNPTVAPTHDVTDDR   |        |
| 60                                        |                                                               |        |
| HAdV-F/HAdV-41                            | MATPSMMPQWSYMHIAQDASEYLSPLGVQFARATDTYFSLGNKFRNPTVAPTHDVTDDR   |        |
| 60                                        |                                                               |        |
| *****                                     |                                                               |        |
| KNA-S6                                    | SQRLTLRFVPVDREDTAYSYKVRFTLAVGDNRVLDMASTYFDIRGVLDRGPSFK        | PYSGTA |
| 120                                       |                                                               |        |
| HAdV-F/HAdV-40                            | SQRLTLRFVPVDREETAYSYKVRFTLAVGDNRVLDMASTYFDIRGVLDRGPSFK        | PYSGTA |
| 120                                       |                                                               |        |
| SAdV-F/SAdV-17                            | SQRLTLRFVPVDREDTAYSYKVRFTLAVGDNRVLDMASTYFDIRGVLDRGPSFK        | PYSGTA |
| 120                                       |                                                               |        |
| KNA-08975                                 | SQRLTLRFVPVDREDTAYSYKVRFTLAVGDNRVLDMASTYFDIRGVLDRGPSFK        | PYSGTA |
| 120                                       |                                                               |        |
| SAdV-F/SAdV-18                            | SQRLTLRFVPVDREDTAYSYKVRFTLAVGDNRVLDMASTYFDIRGVLDRGPSFK        | PYSGTA |
| 120                                       |                                                               |        |
| HAdV-F/HAdV-41                            | SQRLTLRFVPVDREDTAYSYKVRFTLAVGDNRVLDMASTYFDIRGVLDRGPSFK        | PYSGTA |
| 120                                       |                                                               |        |
| *****:*****                               |                                                               |        |
| KNA-S6                                    | YNSLAPKGAPNPSQWTNSVTNTKTSSFGQAPFIGEKITNE-GVQVGTD--SGGDVFADK   |        |
| 177                                       |                                                               |        |
| HAdV-F/HAdV-40                            | YNSLAPKGAPNPSQWTN---QNKTNSFGQAPYIGQKITNQ-GVQVGSDS--NNRDVFADK  |        |
| 174                                       |                                                               |        |
| SAdV-F/SAdV-17                            | YNSLAPKNA PNACQWTSTTNGNKTNTFAQAPFIGLSITKD-GVQVGVDTSQTQQAVYADK |        |
| 179                                       |                                                               |        |
| KNA-08975                                 | YNSLAPKGAPNPSEWK--TDSKVNVRGQAPFFSTSISKD-GIQVGTDSTPTQAIYADK    |        |
| 177                                       |                                                               |        |
| SAdV-F/SAdV-18                            | YNSLAPKGAPNPSEWK--SDNKISVRGQAPFFSTSITKD-GIQVATDTSS--GAVYAKK   |        |
| 175                                       |                                                               |        |
| HAdV-F/HAdV-41                            | YNSLAPKTAPNPCEWK---DNNKIKVRGQAPFIGTNINKDNGIQIGTDTTN--QPIYADK  |        |
| 175                                       |                                                               |        |
| ***** **..:*. .*. .***:..*.::*:..*: :*:.* |                                                               |        |
| KNA-S6                                    | TFQPEPQVGQTQWNIDPTQN--AAGRILKKTTPMQPCYGSYARPTNEQGGQAKLVVNG-G  |        |
| 234                                       |                                                               |        |
| HAdV-F/HAdV-40                            | TYQPEPQVGQTQWNINPMQN--AAGRILKQTTPMQPCYGSYARPTNEKGGQAKLVKNDN   |        |
| 232                                       |                                                               |        |
| SAdV-F/SAdV-17                            | SFQPEPQVGESQWNSNPTTN--AAGRVLPKTTAMLPCYGSYAYPTNEKGG-----       |        |
| 227                                       |                                                               |        |
| KNA-08975                                 | TYQPEPQVGQEQWNSEAGDNDKVAGRVLDSTPMFPCYGSYAKPTNEHGGQCTNSTVDLQ   |        |
| 237                                       |                                                               |        |
| SAdV-F/SAdV-18                            | EYQPEPQVGQEQWNSEASDSKIVAGRVLDSTPMFPCYGSYAKPTNEQGGQGTN-TVVDLQ  |        |
| 234                                       |                                                               |        |
| HAdV-F/HAdV-41                            | TYQPEPQVGQTQWNSEVGAAQKVAGRVLDSTPMLPCYGSYAKPTNEKGGQASLITNGTD   |        |
| 235                                       |                                                               |        |
| :*****: *** : .***:* :*. * ***** ***:**   |                                                               |        |
| KNA-S6                                    | QTQTTDVSLNFFTASESSSFTPKVVLVYGEDVNLEAPDTHLVFKPDTND--TSAEILLGQ  |        |
| 292                                       |                                                               |        |



[illegible]

|                |                                                                 |
|----------------|-----------------------------------------------------------------|
| KNA-S6         | PFHIQVPQKFFAIKNLLLLPGSYTYEWNFRKDVNMILQSSSLGNDLRVDGASVKFDSINLY   |
| 589            |                                                                 |
| HAdV-F/HAdV-40 | PFHIQVPQKFFAIKNLLLLPGSYTYEWNFRKDVNMILQSSSLGNDLRVDGASVRFDSINLY   |
| 587            |                                                                 |
| SAdV-F/SAdV-17 | PFHIQVPQKFFAIKNLLLLPGSYTYEWNFRKDVNMILQSSSLGNDLRVDGASVRFDSINLY   |
| 581            |                                                                 |
| KNA-08975      | PFHIQVPQKFFAIKNLLLLPGSYTYEWNFRKDVNMILQSSSLGNDLRVDGASVRFDSINLY   |
| 586            |                                                                 |
| SAdV-F/SAdV-18 | PFHIQVPQKFFAIKNLLLLPGSYTYEWNFRKDVNMILQSSSLGNDLRVDGASVRFDSINLY   |
| 581            |                                                                 |
| HAdV-F/HAdV-41 | PFHIQVPQKFFAIKNLLLLPGSYTYEWNFRKDVNMILQSSSLGNDLRVDGASVRFDSINLY   |
| 589            | *****:*****                                                     |
| KNA-S6         | ANFFPMAHNTASTLEAMLRNDTNDQSFNDYLCAANMLYPIPANATSVPISSIPSRNWAAFR   |
| 649            |                                                                 |
| HAdV-F/HAdV-40 | ANFFPMAHNTASTLEAMLRNDTNDQSFNDYLCAANMLYPIPANATSVPISSIPSRNWAAFR   |
| 647            |                                                                 |
| SAdV-F/SAdV-17 | ANFFPMAHNTASTLEAMLRNDTNDQSFNDYLCAANMLYPIPANATSVPISSIPSRNWAAFR   |
| 641            |                                                                 |
| KNA-08975      | ANFFPMAHNTASTLEAMLRNDTNDQSFNDYLCAANMLYPIPANATSVPISSIPSRNWAAFR   |
| 646            |                                                                 |
| SAdV-F/SAdV-18 | ANFFPMAHNTASTLEAMLRNDTNDQSFNDYLCAANMLYPIPANATSVPISSIPSRNWAAFR   |
| 641            |                                                                 |
| HAdV-F/HAdV-41 | ANFFPMAHNTASTLEAMLRNDTNDQSFNDYLCAANMLYPIPSNATSVPISSIPSRNWAAFR   |
| 649            | *****:*****                                                     |
| KNA-S6         | GWSFTRLKTKETPSLGS GFDPYFTYSGSIPYLDGTFYLNHTFKKVSVMFDSVSWPGNDR    |
| 709            |                                                                 |
| HAdV-F/HAdV-40 | GWSFTRLKTKETPSLGS GFDPYFTYSGSVPYLDGTFYLNHTFKKVSVMFDSVSWPGNDR    |
| 707            |                                                                 |
| SAdV-F/SAdV-17 | GWSFTRLKTKETPSLGS GFDPYFTYSGSIPYLDGTFYLNHTFKKVSIMFDSVSWPGNDR    |
| 701            |                                                                 |
| KNA-08975      | GWSFTRLKTRETPSLGS GFDPYFTYSGSIPYLDGTFYLNHTFKKVSIMFDSVSWPGNDR    |
| 706            |                                                                 |
| SAdV-F/SAdV-18 | GWSFTRLKTKETPSLGS GFDPYFTYSGSIPYLDGTFYLNHTFKKVSIMFDSVSWPGNDR    |
| 701            |                                                                 |
| HAdV-F/HAdV-41 | GWSFTRLKTKETPSLGS GFDPYFTYSGSVPYLDGTFYLNHTFKKVSIMFDSVSWPGNDR    |
| 709            | *****:*****:*****:*****                                         |
| KNA-S6         | LLTPNEFEIKRTVDGEGYNVAQCNMTKDWFLIQMLSHYNIGYQGFYVPEGYKDRMYSFFR    |
| 769            |                                                                 |
| HAdV-F/HAdV-40 | LLTPNEFEIKRTVDGEGYNVAQCNMTKDWFLIQMLSHYNIGYQGFHPESYKDRMYSFFR     |
| 767            |                                                                 |
| SAdV-F/SAdV-17 | LLTPNEFEIKRTVDGEGYNVAQCNMTKDWFLIQMLSHYNIGYQGFYVPEGYKDRMYSFFR    |
| 761            |                                                                 |
| KNA-08975      | LLTPNEFEIKRTVDGEGYNVAQCNMTKDWFLIQMLSHYNIGYQGFYVPEGYKDRMYSFFR    |
| 766            |                                                                 |
| SAdV-F/SAdV-18 | LLTPNEFEIKRTVDGEGYNVAQCNMTKDWFLIQMLSHYNIGYQGFYVPEGYKDRMYSFFR    |
| 761            |                                                                 |
| HAdV-F/HAdV-41 | LLTPNEFEIKRTVDGEGYNVAQCNMTKDWFLIQMLSHYNIGYQGFYVPESYKDRMYSFFR    |
| 769            | *****:***.*****                                                 |
| KNA-S6         | NFQPM SRQVVD TTSYSDYKNVTLPFQHNNSGFVG YMGPTMREGQAYPANYPYPLIGKTAV |
| 829            |                                                                 |
| HAdV-F/HAdV-40 | NFQPM SRQVVD TTTYTEYQNVTLPFQHNNSGFVG YMGPAIREGQAYPANYPYPLIGQTAV |
| 827            |                                                                 |
| SAdV-F/SAdV-17 | NFQPM SRQVVD SVNYANYKEVKLPFQHNNSGFVG YMGPTMREGQAYPANYPYPLIGKTAV |
| 821            |                                                                 |
| KNA-08975      | NFQPM SRQVVD TTTYSDYQNVTLPFQHNNSGFVG YMGPTMREGQAYPANYPYPLIGKTAV |
| 826            |                                                                 |
| SAdV-F/SAdV-18 | NFQPM SRQVVD TTTYTDYKNVTLPFQHNNSGFVG YMGPTMREGQAYPANYPYPLIGKTAV |
| 821            |                                                                 |
| HAdV-F/HAdV-41 | NFQPM SRQVVD TTTYKEYQNVTLPFQHNNSGFVG YMGPTMREGQAYPANYPYPLIGQTAV |
| 829            | *****:..* :*:*.*****:*****:***                                  |

|                |                                                              |
|----------------|--------------------------------------------------------------|
| KNA-S6         | PSLTQKKFLCDRTMWRIPFSSNFMSMGALTDLGQNMLYANSAHALDMTFEVDPMDEPTLL |
| 889            |                                                              |
| HAdV-F/HAdV-40 | PSLTQKKFLCDRTMWRIPFSSNFMSMGALTDLGQNMLYANSAHALDMTFEVDPMDEPTLL |
| 887            |                                                              |
| SAdV-F/SAdV-17 | DSLTQKKFLCDRTMWRIPFSSNFMSMGALTDLGQNMLYANSAHALDMTFEVDPMDEPTLL |
| 881            |                                                              |
| KNA-08975      | PSLTQKKFLCDRTMWRIPFSSNFMSMGALTDLGQNMLYANSAHALDMTFEVDPMDEPTLL |
| 886            |                                                              |
| SAdV-F/SAdV-18 | PSLTQKKFLCDRTMWRIPFSSNFMSMGALTDLGQNMLYANSAHALDMTFEVDPMDEPTLL |
| 881            |                                                              |
| HAdV-F/HAdV-41 | PSLTQKKFLCDRTMWRIPFSSNFMSMGALTDLGQNMLYANSAHALDMTFEVDPMDEPTLL |
| 889            |                                                              |

\*\*\*\*\*

|                |                                       |     |
|----------------|---------------------------------------|-----|
| KNA-S6         | YVLFEVFDVVRIHQPHRGVIEAVYLRTPFSAAGNATT | 925 |
| HAdV-F/HAdV-40 | YVLFEVFDVVRIHQPHRGVIEAVYLRTPFSAAGNATT | 923 |
| SAdV-F/SAdV-17 | YVLFEVFDVVRIHQPHRGVIEAVYLRTPFSAAGNATT | 917 |
| KNA-08975      | YVLFEVFDVVRIHQPHRGVIEAVYLRTPFSAAGNATT | 922 |
| SAdV-F/SAdV-18 | YVLFEVFDVVRIHQPHRGVIEAVYLRTPFSAAGNATT | 917 |
| HAdV-F/HAdV-41 | YVLFEVFDVVRIHQPHRGVIEAVYLRTPFSAAGNATT | 925 |

\*\*\*\*\*

**Figure S4.** Multiple alignment of the complete deduced amino acid (aa) sequences of the putative hexons of simian adenovirus (SAdV) strains KNA-S6 and KNA-08975 with those of SAdV-F/SAdV-17 strain B-105 (GenBank accession number KP329566), SAdV-F/SAdV-18 strain C676 (FJ025931), Human AdV-F (HAdV-F)/HAdV-40 isolate Dugan (L19443), and HAdV-F/HAdV-41 isolate Tak (DQ315364). The region of the putative hexon (genetically divergent between the hexons of SAdV-17, -18, and HAdV-F) that formed the basis of classification of the AdV strains from African green monkeys into group-I and group-II viruses is highlighted with blue. Numbers to the right indicate the positions of the aa for respective AdV strains.

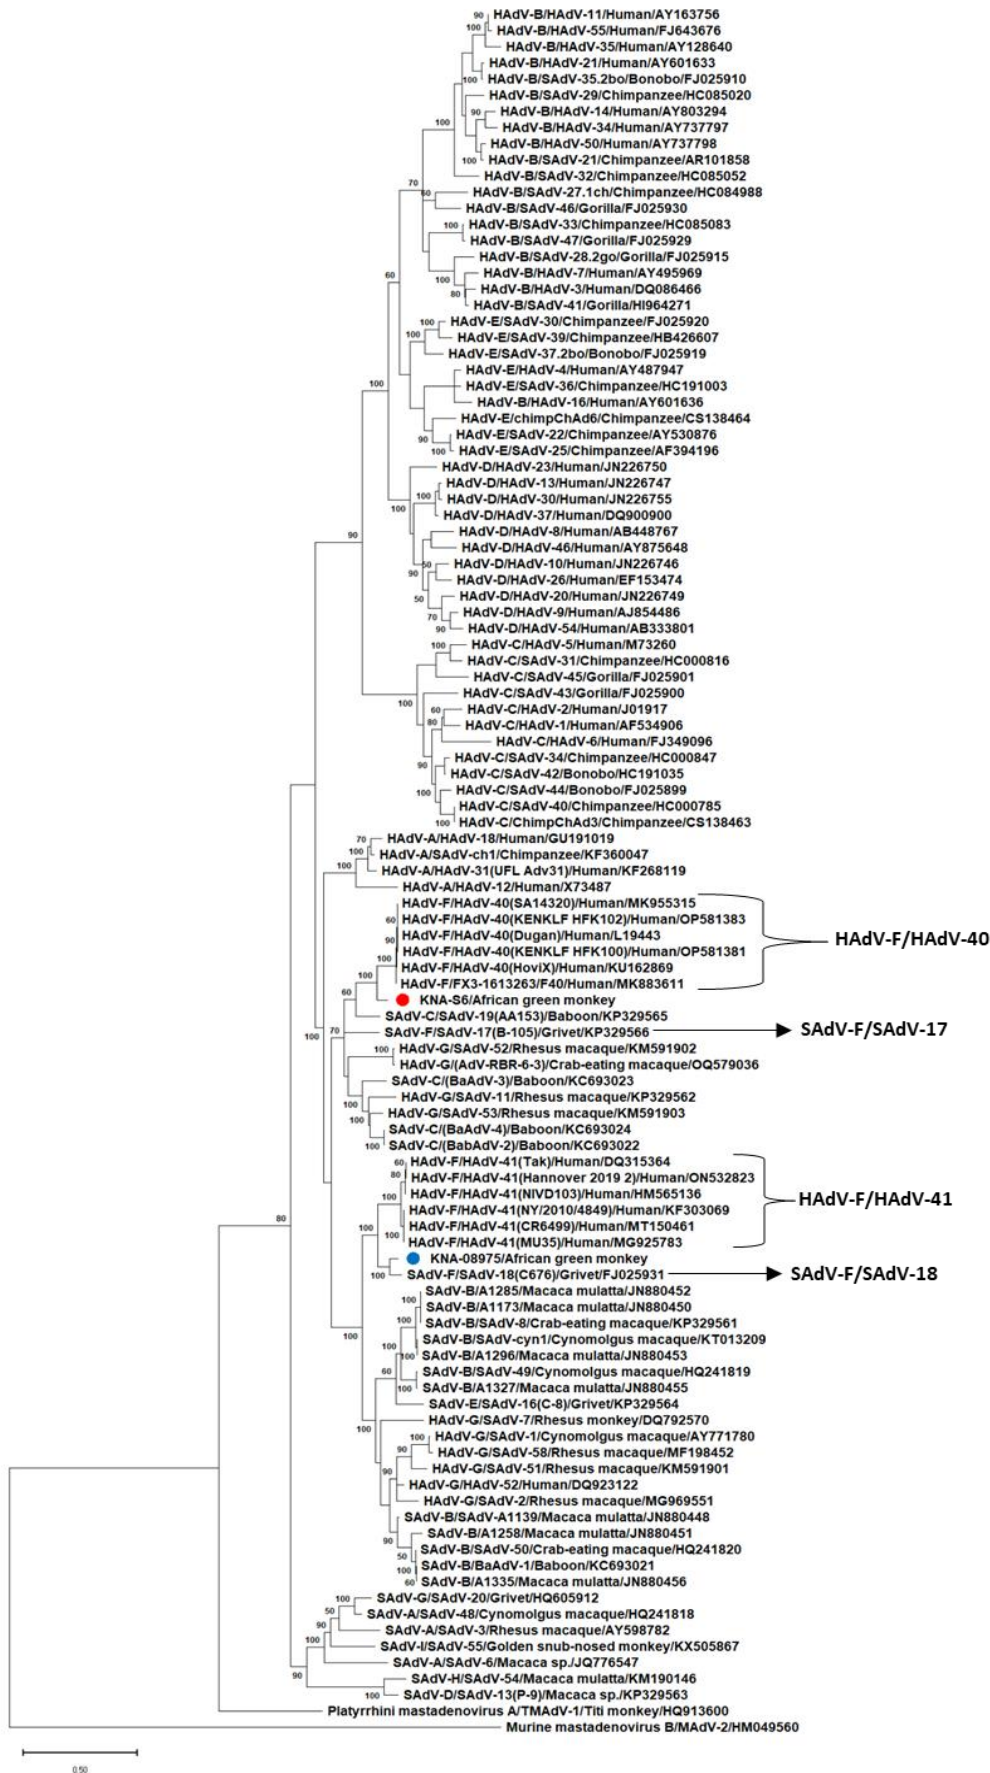

Figure S5. Expanded version of figure 4.



210

```

KNA-S6      NFRLGWDPVTKLVMPGVYTNEAFHPDIVLLPGCGVDFTQSRLSNLLGIRKRMPPQEGFQI
SAdV-F/SAdV-17 NFRLGWDPVTKLVMPGVYTNEAFHPDIVLLPGCGVDFTQSRLSNLLGIRKRMPPQAGFQI
KNA-08975   NFRLGWDPVTKLVMPGVYTNEAFHPDIVLLPGCGVDFTQSRLSNLLGIRKRMPPQEGFQI
SAdV-F/SAdV-18 NFRLGWDPVTKLVMPGVYTNEAFHPDIVLLPGCGVDFTQSRLSNLLGIRKRMPPQAGFQI
HAdV-F/HAdV-40 NFRLGWDPVTKLVMPGVYTNEAFHPDIVLLPGCGVDFTQSRLSNLLGIRKRMPPQKGFQI
HAdV-F/HAdV-41 NFRLGWDPVTKLVMPGVYTNEAFHPDIVLLPGCGVDFTQSRLSNLLGIRKRLPFQEGFQI
*****.*****:*** ****

KNA-S6      MYNDLEGGNIPALLDVAKYEASITEAQQQGKEIRGDTFAVSPQDLVIEPVANDSKNRSYN
SAdV-F/SAdV-17 MYEDLEGGNIPALLDVAKYEASITQAQQQGKEIRGDTFAVSPQDLVIEPVANDSKNRSYN
KNA-08975   MYEDLEGGNIPALLDVAKYEASIQQAREQGQEIIRGDNFTVIPRDVEIVPVEQDSKGRSYN
SAdV-F/SAdV-18 MYEDLEGGNIPALLDVAKYEASIQKAREQGQEIIRGDNFTVIPRDVEIVPVEKDSKDRSYN
HAdV-F/HAdV-40 MYEDLEGGNIPALLDVAKYEASIKEA----QEIRGADFKPNPQDLEIVPVEKDSKERSYN
HAdV-F/HAdV-41 MYEDLEGGNIPALLDVAKYEASIQKAKEEGKEIGDDTFATRPQDLVIEPVAKDSKNRSYN
*:*****:*****:*****:*****:*****:*****:*****:*****

KNA-S6      LLPDDKNNTAYRSWFLAYNYGDPEKGVRSWTLLTTTDDVTCGQQQVYWSLPDMMQDPVTFR
SAdV-F/SAdV-17 LLPDDKNNTAYRSWFLAYNYGDPEKGVRSWTLLTTTDDVTCGQQQVYWSLPDMMQDPVTFR
KNA-08975   LIPTDKTNTAYRSWFLAYNYGDPEKGVRSWTLLTTTDDVTCGQQQVYWSLPDMMQDPVTFR
SAdV-F/SAdV-18 LLPGDQNTAYRSWFLAYNYGDPEKGVRSWTLLTTTDDVTCGQQQVYWSLPDMMQDPVTFR
HAdV-F/HAdV-40 LLEGDKNNTAYRSWFLAYNYGDAEKGVKSWTLLTTTDDVTCGQQQVYWSLPDMMQDPVTFR
HAdV-F/HAdV-41 LLPNDQNNTAYRSWFLAYNYGDPKKGVSWTLLTTADVTCGQQQVYWSLPDMMQDPVTFR
*:*.***:*****:*****:*****:*****:*****:*****:*****

KNA-S6      PSSQVSNYPVVGVELLPVHAKSFYNEQAVYSQLIRQSTALTHVFNRFPENQILVRPPAPT
SAdV-F/SAdV-17 PSSQVSNYPVVGVELLPVHAKSFYNEQAVYSQLIRQSTALTHVFNRFPENQILVRPPAPT
KNA-08975   PSSQVSNYPVVGVELLPVHAKSFYNEQAVYSQLIRQSTALTHVFNRFPENQILVRPPAPT
SAdV-F/SAdV-18 PSSQVSNYPVVGVELLPVHAKSFYNEQAVYSQLIRQSTALTHVFNRFPENQILVRPPAPT
HAdV-F/HAdV-40 PSTQVSNYPVVGVELLPVHAKSFYNEQAVYSQLIRQSTALTHVFNRFPENQILVRPPAPT
HAdV-F/HAdV-41 PSTQVSNYPVVGVELLPVHAKSFYNEQAVYSQLIRQSTALTHVFNRFPENQILVRPPAPT
*:*****:*****:*****:*****:*****:*****:*****:*****

KNA-S6      ITTVSENVPALTDHGTLPRLSSISGVQRVTITDARRRTCYPVHKALGIVAPKVLSSRTF
SAdV-F/SAdV-17 ITTVSENVPALTDHGTLPRLSSISGVQRVTITDARRRTCYPVHKALGIVAPKVLSSRTF
KNA-08975   ITTVSENVPALTDHGTLPRLSSISGVQRVTITDARRRTCYPVHKALGIVAPKVLSSRTF
SAdV-F/SAdV-18 ITTVSENVPALTDHGTLPRLSSISGVQRVTITDARRRTCYPVHKALGIVAPKVLSSRTF
HAdV-F/HAdV-40 ITTVSENVPALTDHGTLPRLSSISGVQRVTITDARRRTCYPVHKALGIVAPKVLSSRTF
HAdV-F/HAdV-41 ITTVSENVPALTDHGTLPRLSSISGVQRVTITDARRRTCYPVHKALGIVAPKVLSSRTF
*****

```

508

**Figure S7.** Multiple alignment of the partial deduced amino acid (aa) sequences of the putative penton bases of simian adenovirus (SAdV) strains KNA-S6 and KNA-08975 with cognate sequences of SAdV-F/SAdV-17 strain B-105 (GenBank accession number KP329566), SAdV-F/SAdV-18 strain C676 (FJ025931), Human AdV-F (HAdV-F)/HAdV-40 isolate Dugan (L19443), and HAdV-F/HAdV-41 isolate Tak (DQ315364). The putative 'RGD' motif is highlighted with green and was absent in HAdV-F strains. The aa numbers shown here correspond to those of the complete deduced aa sequence of penton base of SAdV-F/SAdV-18.



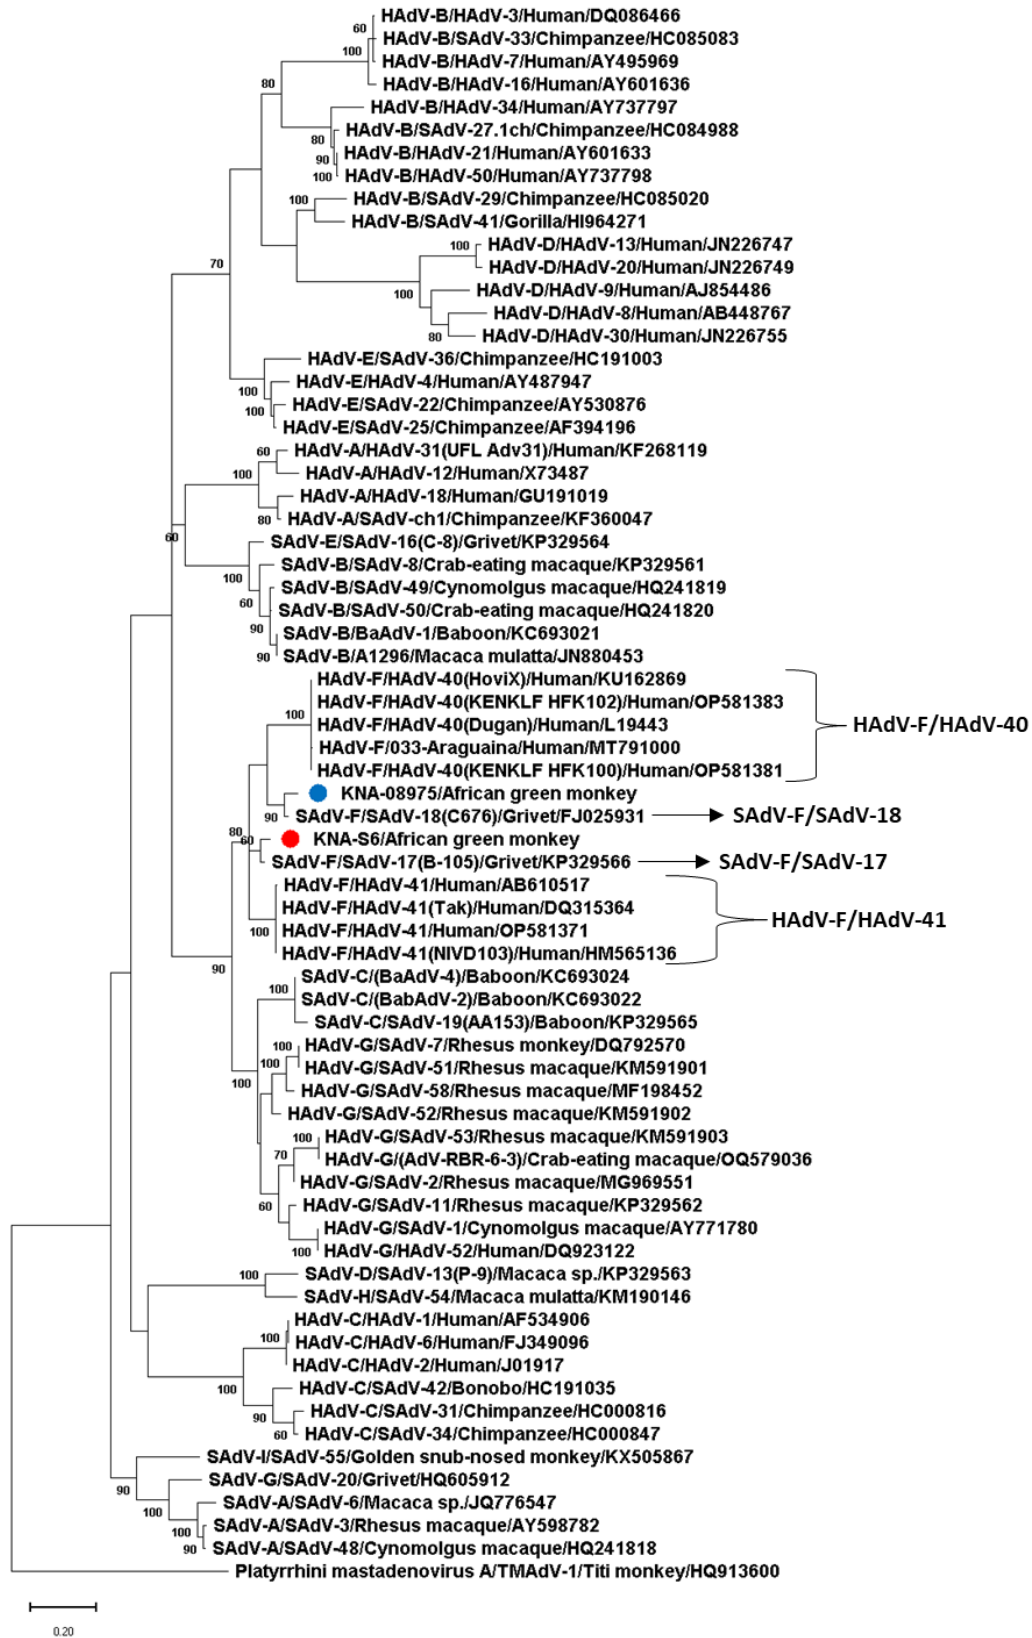

Figure S8. Expanded version of figure 5.

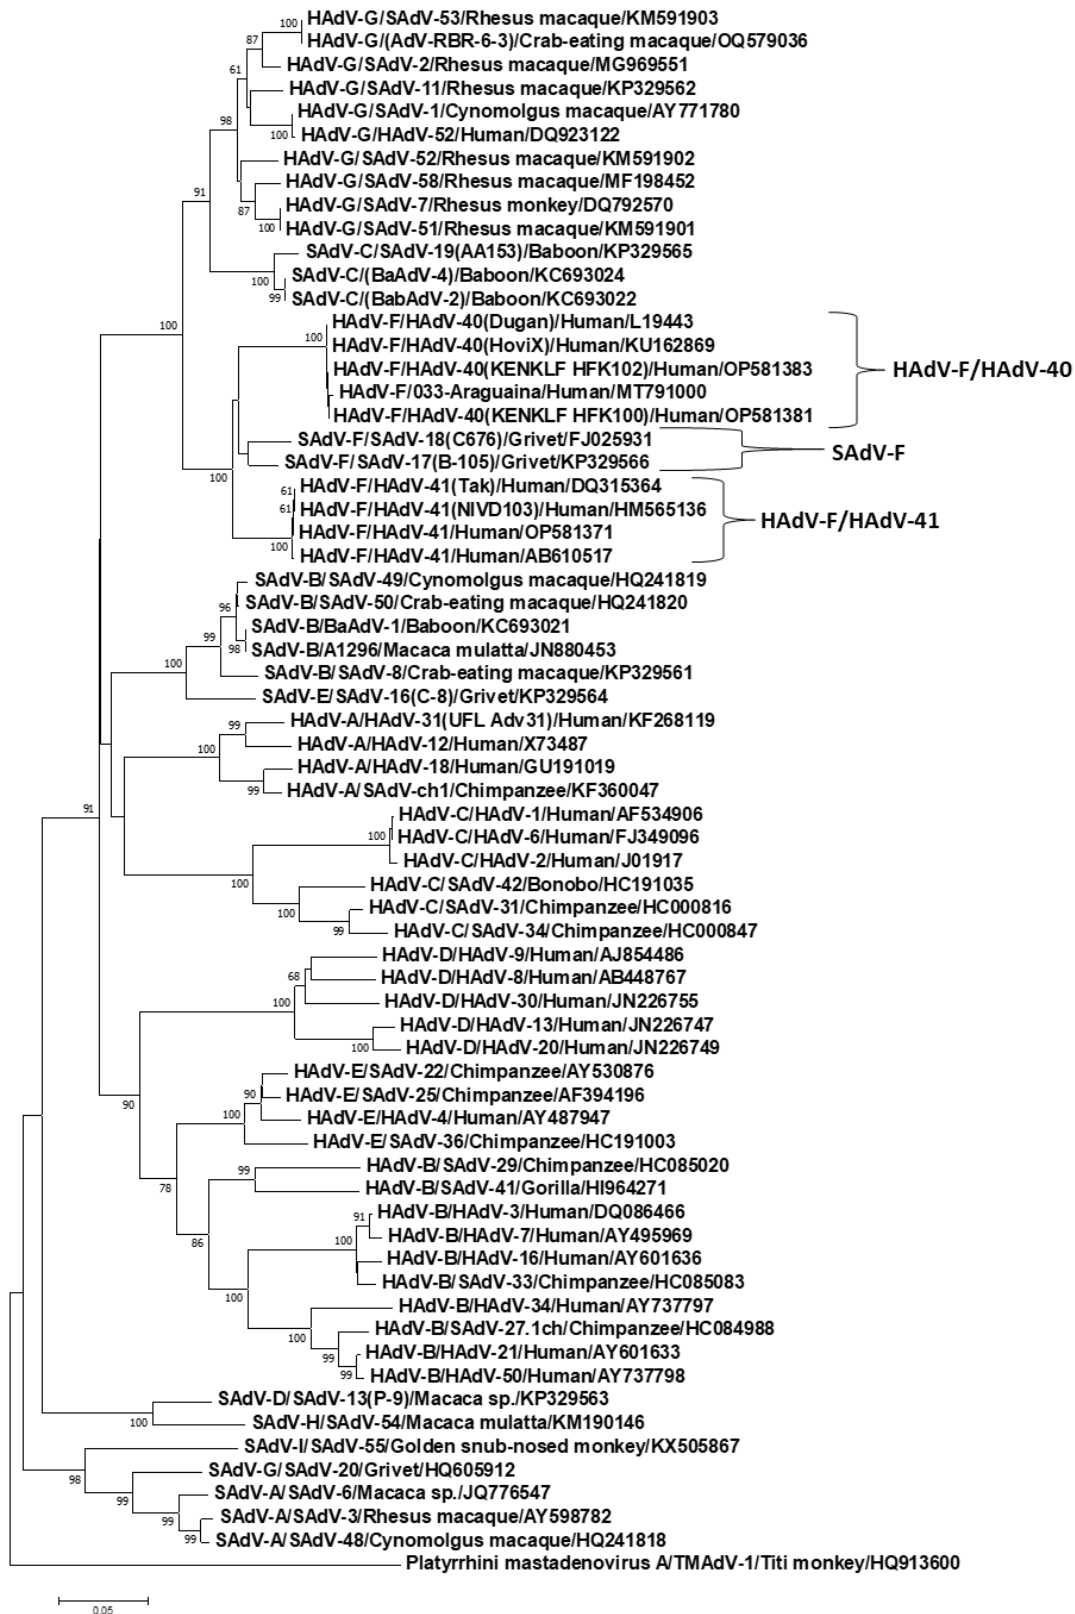

**Figure S9.** Phylogenetic analysis of the complete deduced amino acid (aa) sequences of the putative penton bases of simian adenoviruses (SAdVs) and human adenoviruses (HAdVs). The phylogenetic analysis was performed as described under 'Materials and Methods' section. Bootstrap values < 60% are not shown. Scale bar, 0.05 substitutions per aa residue.
